# Supplementary material for: SS1P Immunotoxin Induces Markers of Immunogenic Cell Death and Enhances the Effect of the CTLA-4 Blockade in AE17M Mouse Mesothelioma Tumors
Source: PubMed Central journal article supplement (PMC6265743; doi:10.3390/toxins10110470), 2018-11-14
Supplement: toxins-10-00470-s001.pdf [file toxins-10-00470-s001.pdf]

## Supplementary Materials: SS1P Immunotoxin Induces Markers of Immunogenic Cell Death and Enhances the Effect of CTLA-4 Blockade in AE17M Mouse Mesothelioma Tumors

Yasmin Leshem, Emily M King, Ronit Mazor, Yoram Reiter and Ira Pastan

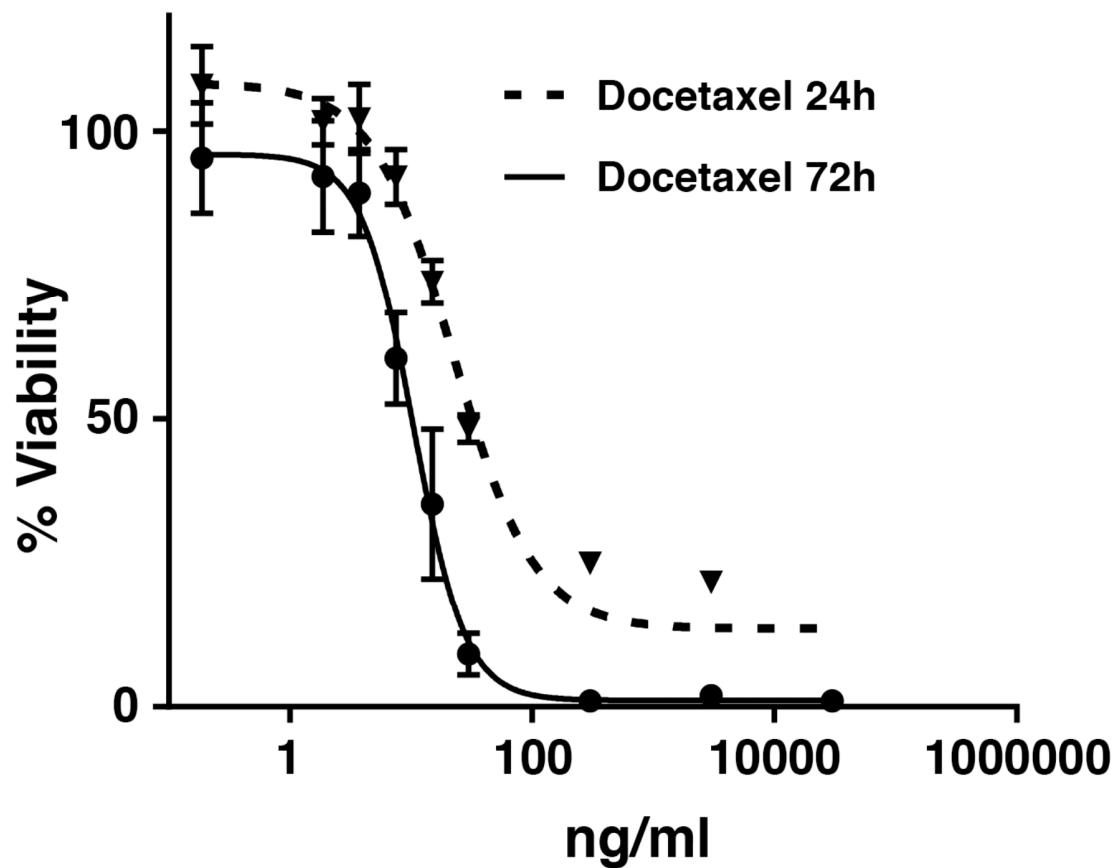

**Figure S1.** Cytotoxic activity of Docetaxel in AE17 cells. WST-8 cytotoxicity assays in AE17M cells after 24 h or 72 h of incubation with docetaxel.

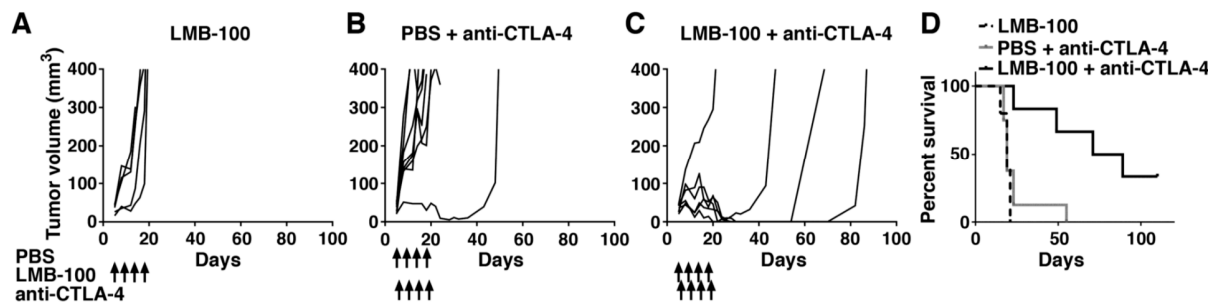

**Figure S2.** LMB-100 and anti-CTLA-4 effect on AE17M tumor growth in mice.(A–C) Individual tumor growth curves of AE17M tumors treated with (A) 30 µg LMB-100 i.t. alone (*n* = 5), (B) PBS i.t. and 25 µg anti-CTLA-4 i.p.(*n* = 8), and (C) 30 µg LMB-100 i.t. and 25 µg anti-CTLA-4 i.p.(*n* = 6). (D) Long-term survival of mice described in A–C. Survival of mice treated with LMB-100 and anti-CTLA-4 was significantly longer than that in the other groups (*p* < 0.01).

| Group                        | Experiment | CR out of Total ( <i>n/n</i> ) | Median Survival   |
|------------------------------|------------|--------------------------------|-------------------|
| <b>SS1P + Anti-CTLA-4</b>    | 1          | 4/6                            | >90 *             |
|                              | 2          | 1/8                            | 31 * <sup>I</sup> |
|                              | 3          | 7/8                            | >90 *             |
| <b>LMB-100 + Anti-CTLA-4</b> | 2          | 2/6                            | 73 *              |
|                              | 3          | 4/8                            | 45 *              |
|                              | 4          | 2/8                            | 37 *              |
| <b>SS1P alone</b>            | 1          | 0/6                            | 19                |
|                              | 2          | 0/8                            | 21                |
|                              | 3          | 0/8                            | 18                |
| <b>LMB-100 alone</b>         | 2          | 0/5                            | 19                |
|                              | 3          | 0/8                            | 20                |
|                              | 4          | 0/8                            | 22                |
| <b>PBS + Anti-CTLA-4</b>     | 1          | 1/6                            | 28                |
|                              | 2          | 0/8                            | 19 <sup>I</sup>   |
|                              | 3          | 2/8                            | 20                |
|                              | 4          | 0/5                            | 19                |

**Table S1.** Survival of mice treated with anti-mesothelin immunotoxins and anti-CTLA-4. Survival of mice in four separate experiments numbered 1 to 4 in which AE17M tumor bearing mice were treated with either i.t. PBS or i.t. SS1P (8 to 10 µg) or i.t. LMB-100 (30 to 60 µg) with or without i.p. anti-CTLA-4 (25 µg). i.t. treatment was given on days 5, 9, 13 and 17 and anti-CTLA-4 on days 6, 10, 14 and 18. *n*, number of mice.CR, complete regression \* a significant survival benefit was found compare to that of mice treated with PBS and anti-CTLA-4 in the same experiment (*p* < 0.05). <sup>I</sup> inexperienced operator was giving i.t. treatment.
